# Supplementary material for: Growth and characterization of 6-chloro-2,4-dinitroaniline crystals in anti-solvent precipitation and reprecipitation methods
Source: Royal Society of Chemistry journal article supplement (doi:10.1039/c3ce42634c), 2014-01-01
Supplement: c3ce42634c1.pdf [file c3ce42634c1.pdf]

## Growth and characterization of 6-chloro-2,4-dinitroaniline crystals in anti-solvent precipitation and reprecipitation methods

Rajaboopathi Mani<sup>a,b</sup>, Krishnakumar Varadharajan<sup>b\*</sup>, Marjatta Louhi-Kultanen<sup>a\*</sup>

<sup>a</sup>Department of Chemical Technology, Lappeenranta University of Technology, Lappeenranta 53851, Finland

<sup>b</sup>Department of Physics, Periyar University, Salem 636 011, India

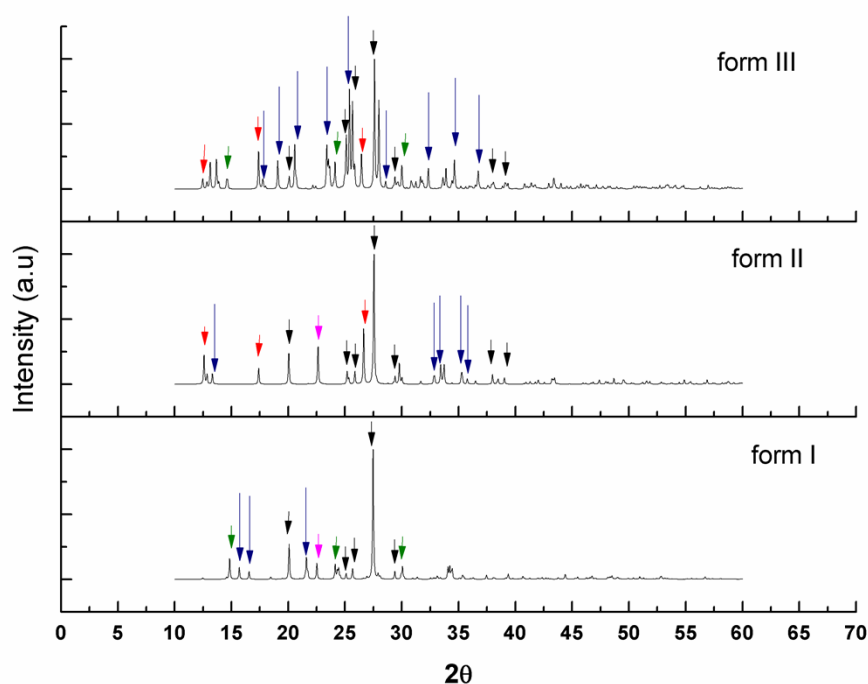

Fig. 1S. XRPD of CDA polymorphism. The characteristic peaks of each form is indicted by blue color arrow. The common peaks in all the three forms are indicated by black color arrow. Red, green and pink color arrow indicates common peaks between form II and form III, form I and form III, and form I and form II respectively [21].

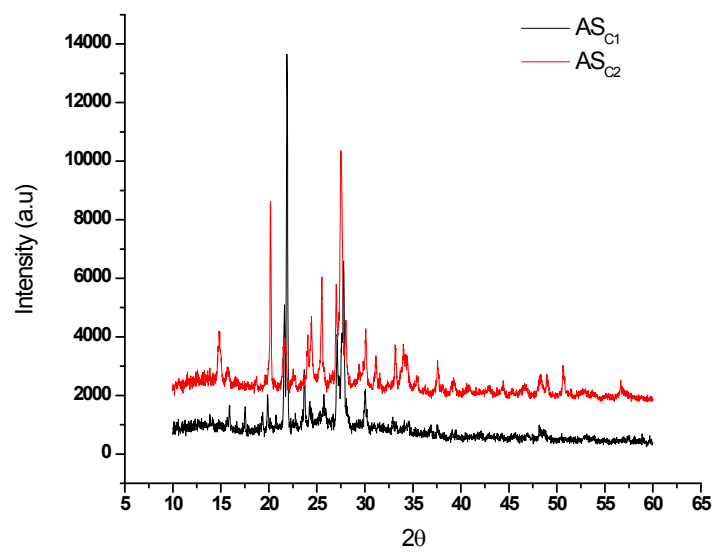

Fig. 2S. XRPD plot of AS<sub>C1</sub> and AS<sub>C2</sub>.

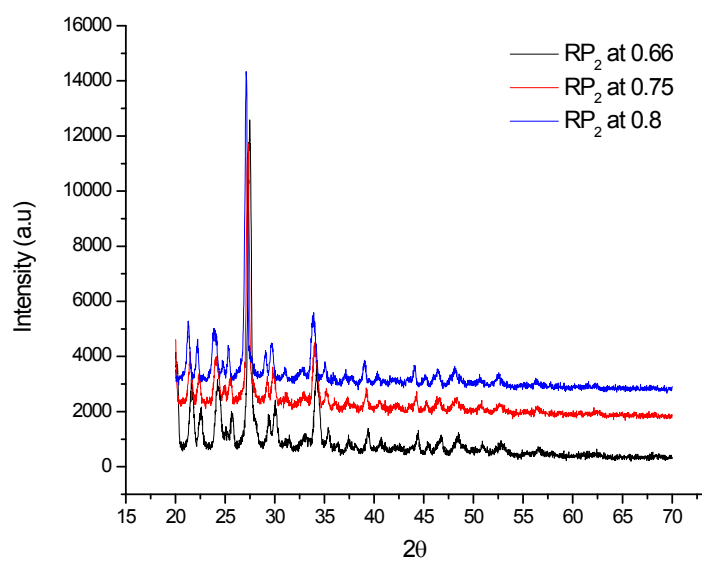

Fig. 3S. XRPD plot of precipitate obtained in RP<sub>2</sub>.

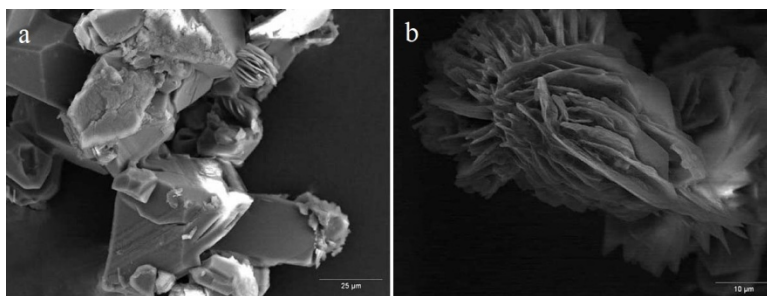

Fig. 4S. (a) SEM image of form I crystal obtained from filtrate solutions. The volume fraction is 0.6 at water addition rate  $0.2 \text{ ml min}^{-1}$  (b) Magnified image ( $10 \text{ μm}$ ) of superstructure.

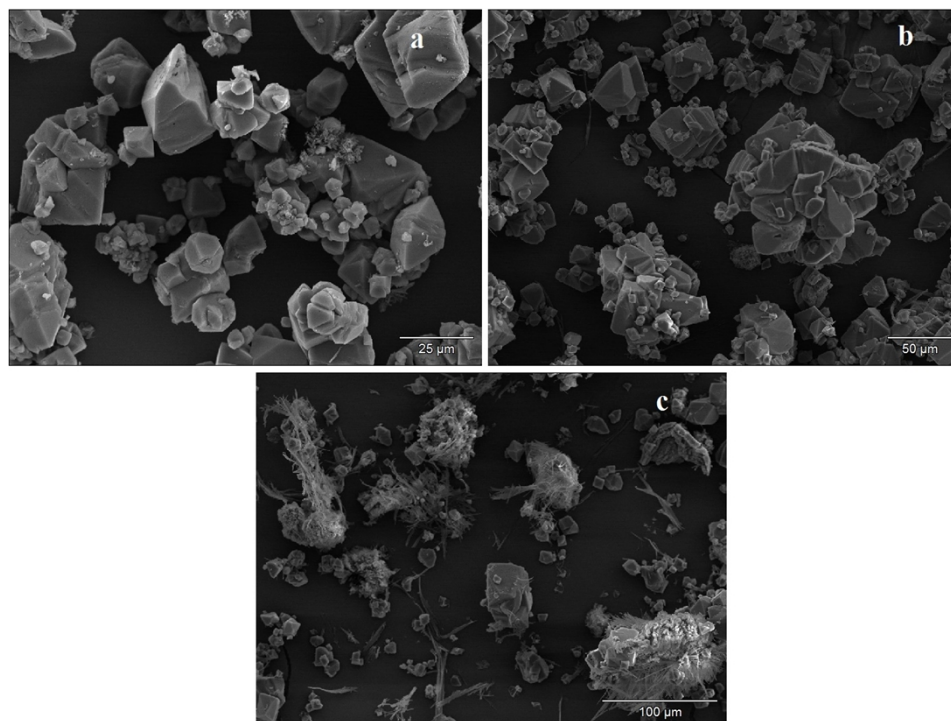

Fig. 5S. SEM image of precipitate obtained in  $RP_2$  at volume fraction of 0.66 (a), 0.75 (b) and 0.8 (c)

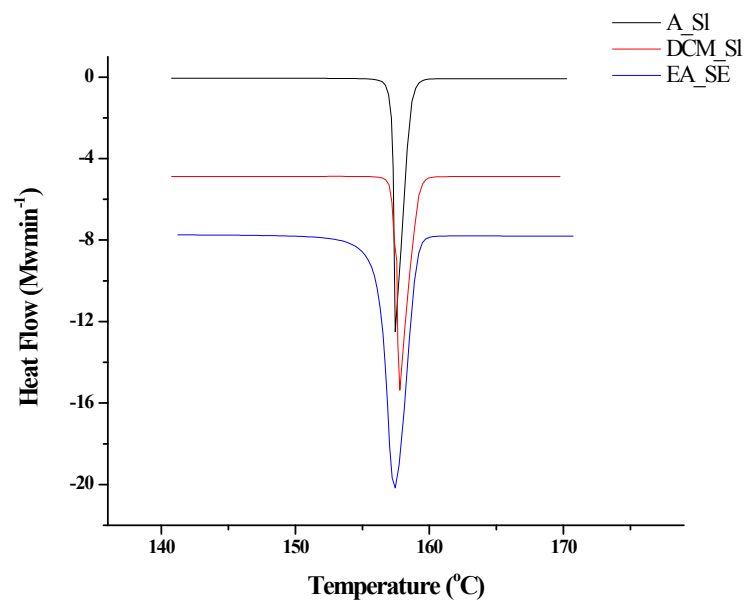

Fig. 6S. Melting point of AS<sub>P1</sub>, AS<sub>P2</sub> and AS<sub>C3</sub>. The sample were scanned at the rate of 5 K min<sup>-1</sup>
